# Supplementary material
Source: PubMed Central journal article supplement (PMC4156726)
Supplement: 1402617111_pnas.201402617SI.pdf [file 1402617111_pnas.201402617SI.pdf]

# Supporting Information

Palovaara et al. 10.1073/pnas.1402617111

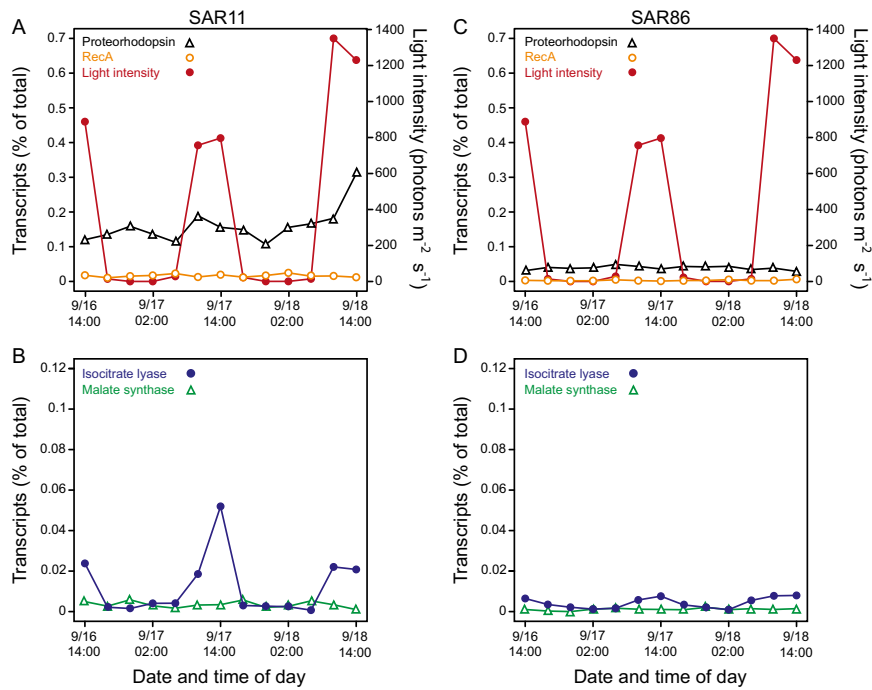

**Fig. S1.** Taxon-specific dynamics in gene expression patterns in the Pacific off Monterey Bay. Dynamics in SAR11 (A and B) and SAR86 (C and D) clade-specific relative expression levels of the genes encoding proteorhodopsin and RecA compared with light intensity (A and C) and the genes encoding isocitrate lyase and malate synthase (B and D). Figure based on gene-specific analyses of metatranscriptome data over a 48-h period in natural seawater at 23 m depth reported by Ottesen et al. (1), who showed SAR11 and SAR86 were the dominant heterotrophic bacteria clades in the studied seawater samples. Percent transcripts in total bacterioplankton community were obtained by BLASTX against RefSeq.

1. Ottesen EA, et al. (2013) Pattern and synchrony of gene expression among sympatric marine microbial populations. *Proc Natl Acad Sci USA* 110(6):E488–E497.







**Table S2. Abundance of the genes encoding PR, isocitrate lyase (AceA), malate synthase (AceB), and recombinase A (RecA) in samples from the global ocean survey**

| Sample                                | Total peptides | PR (no. of hits) | AceA (no. of hits) | AceB (no. of hits) | RecA (no. of hits) | PR:RecA (%) | AceA:RecA (%) | AceB:RecA (%) |
|---------------------------------------|----------------|------------------|--------------------|--------------------|--------------------|-------------|---------------|---------------|
| GS000a—Sargasso Sea                   | 1,002,506      | 179              | 329                | 502                | 303                | 59.1        | 108.6         | 165.7         |
| GS000b—Sargasso Sea                   | 492,305        | 262              | 230                | 430                | 339                | 77.3        | 67.8          | 126.8         |
| GS000c—Sargasso Sea                   | 564,575        | 256              | 214                | 340                | 329                | 77.8        | 65.0          | 103.3         |
| GS000d—Sargasso Sea                   | 517,249        | 229              | 190                | 433                | 344                | 66.6        | 55.2          | 125.9         |
| GS001c—Hydrostation S                 | 138,631        | 96               | 63                 | 108                | 141                | 68.1        | 44.7          | 76.6          |
| GS002—Gulf of Maine                   | 195,047        | 93               | 68                 | 126                | 159                | 58.5        | 42.8          | 79.2          |
| GS003—Browns Bank Gulf of Maine       | 100,992        | 43               | 37                 | 43                 | 59                 | 72.9        | 62.7          | 72.9          |
| GS004—Outside Halifax Nova Scotia     | 86,213         | 39               | 50                 | 54                 | 63                 | 61.9        | 79.4          | 85.7          |
| GS005—Bedford Basin Nova Scotia       | 100,367        | 38               | 22                 | 24                 | 97                 | 39.2        | 22.7          | 24.7          |
| GS006—Bay of Fundy Nova Scotia        | 96,567         | 65               | 47                 | 59                 | 97                 | 67.0        | 48.5          | 60.8          |
| GS007—Northern Gulf of Maine          | 84,286         | 43               | 33                 | 27                 | 78                 | 55.1        | 42.3          | 34.6          |
| GS008—Newport Harbor RI               | 211,453        | 89               | 31                 | 106                | 126                | 70.6        | 24.6          | 84.1          |
| GS009—Block Island NY                 | 120,589        | 53               | 49                 | 93                 | 76                 | 69.7        | 64.5          | 122.4         |
| GS010—Cape May NJ                     | 124,769        | 63               | 50                 | 84                 | 87                 | 72.4        | 57.5          | 96.6          |
| GS011—Delaware Bay NJ                 | 202,844        | 76               | 35                 | 104                | 125                | 60.8        | 28.0          | 83.2          |
| GS012—Chesapeake Bay MD               | 205,465        | 75               | 37                 | 87                 | 160                | 46.9        | 23.1          | 54.4          |
| GS013—Off Nags Head NC                | 226,967        | 63               | 57                 | 101                | 116                | 54.3        | 49.1          | 87.1          |
| GS014—South of Charleston SC          | 207,360        | 116              | 98                 | 147                | 188                | 61.7        | 52.1          | 78.2          |
| GS015—Off Key West FL                 | 205,935        | 94               | 65                 | 106                | 145                | 64.8        | 44.8          | 73.1          |
| GS016—Gulf of Mexico                  | 202,962        | 93               | 68                 | 106                | 152                | 61.2        | 44.7          | 69.7          |
| GS017—Yucatan Channel                 | 415,844        | 180              | 128                | 242                | 372                | 48.4        | 34.4          | 65.1          |
| GS018—Rosario Bank                    | 230,700        | 85               | 88                 | 141                | 223                | 38.1        | 39.5          | 63.2          |
| GS019—Northeast of Colon              | 218,170        | 104              | 49                 | 102                | 232                | 44.8        | 21.1          | 44.0          |
| GS020—Lake Gatun                      | 471,840        | 149              | 76                 | 66                 | 537                | 27.7        | 14.2          | 12.3          |
| GS021—Gulf of Panama                  | 212,561        | 88               | 73                 | 140                | 201                | 43.8        | 36.3          | 69.7          |
| GS022—250 miles from Panama City      | 193,148        | 73               | 63                 | 120                | 157                | 46.5        | 40.1          | 76.4          |
| GS023—30 miles from Cocos Island      | 212,713        | 83               | 70                 | 148                | 218                | 38.1        | 32.1          | 67.9          |
| GS025—Dirty Rock Cocos Island         | 201,505        | 15               | 9                  | 7                  | 140                | 10.7        | 6.4           | 5.0           |
| GS026—134 miles NE of Galapagos       | 164,342        | 62               | 61                 | 127                | 152                | 40.8        | 40.1          | 83.6          |
| GS027—Devil's Crown Floreana Island   | 353,225        | 183              | 146                | 258                | 292                | 62.7        | 50.0          | 88.4          |
| GS028—Coastal Floreana                | 301,799        | 164              | 93                 | 213                | 253                | 64.8        | 36.8          | 84.2          |
| GS029—North James Bay Santiago Island | 208,795        | 112              | 66                 | 137                | 184                | 60.9        | 35.9          | 74.5          |
| GS030—Warm seep Roca Redonda          | 492,926        | 243              | 238                | 414                | 410                | 59.3        | 58.0          | 101.0         |
| GS031—Upwelling Fernandina Island     | 688,705        | 362              | 349                | 538                | 565                | 64.1        | 61.8          | 95.2          |
| GS032—Mangrove on Isabella Island     | 233,063        | 33               | 75                 | 82                 | 116                | 28.4        | 64.7          | 70.7          |
| GS033—Hypersaline Lagoon              | 1,083,485      | 210              | 216                | 374                | 533                | 39.4        | 40.5          | 70.2          |
| GS034—North Seamore Island            | 215,123        | 84               | 59                 | 109                | 182                | 46.2        | 32.4          | 59.9          |
| GS035—Wolf Island                     | 225,307        | 119              | 87                 | 129                | 170                | 70.0        | 51.2          | 75.9          |
| GS036—Cabo Marshall Isabella Island   | 124,562        | 41               | 57                 | 64                 | 117                | 35.0        | 48.7          | 54.7          |
| GS037—Equatorial Pacific TAO Buoy     | 101,325        | 45               | 32                 | 78                 | 83                 | 54.2        | 38.6          | 94.0          |
| GS047—201 miles from F, Polynesia     | 102,474        | 48               | 28                 | 64                 | 84                 | 57.1        | 33.3          | 76.2          |
| GS048a—Moorea Cooks Bay               | 142,956        | 56               | 45                 | 89                 | 96                 | 58.3        | 46.9          | 92.7          |
| GS049—Moorea Outside Cooks Bay        | 145,765        | 62               | 38                 | 116                | 117                | 53.0        | 32.5          | 99.1          |
| GS051—Rangirora Atoll                 | 205,339        | 93               | 86                 | 110                | 202                | 46.0        | 42.6          | 54.5          |
| GS108—Lagoon Reef                     | 1,543,979      | 594              | 531                | 1142               | 1549               | 38.3        | 34.3          | 73.7          |
| GS108a—Coccos Keeling Inside Lagoon   | 81,323         | 16               | 21                 | 48                 | 52                 | 30.8        | 40.4          | 92.3          |
| GS109—Indian Ocean                    | 94,829         | 31               | 12                 | 58                 | 72                 | 43.1        | 16.7          | 80.6          |
| GS110a—Indian Ocean                   | 157,847        | 67               | 49                 | 86                 | 145                | 46.2        | 33.8          | 59.3          |
| GS111—Indian Ocean                    | 93,629         | 39               | 36                 | 61                 | 67                 | 58.2        | 53.7          | 91.0          |
| GS112—Indian Ocean                    | 1,217,028      | 400              | 329                | 783                | 1219               | 32.8        | 27.0          | 64.2          |
| GS112a—Indian Ocean                   | 158,989        | 69               | 53                 | 77                 | 121                | 57.0        | 43.8          | 63.6          |
| GS113—Indian Ocean                    | 175,298        | 82               | 66                 | 103                | 144                | 56.9        | 45.8          | 71.5          |
| GS114—500 Miles west Seychelles       | 536,593        | 214              | 175                | 315                | 443                | 48.3        | 39.5          | 71.1          |
| GS115—Indian Ocean                    | 96,414         | 48               | 27                 | 52                 | 73                 | 65.8        | 37.0          | 71.2          |
| GS116—Outside Seychelles Indian Ocean | 96,918         | 49               | 24                 | 67                 | 76                 | 64.5        | 31.6          | 88.2          |
| GS117a—St. Anne Island Seychelles     | 530,775        | 255              | 199                | 333                | 397                | 64.2        | 50.1          | 83.9          |
| GS119—Off Reunion Island              | 97,846         | 43               | 26                 | 70                 | 87                 | 49.4        | 29.9          | 80.5          |
| GS120—Madagascar Waters               | 72,241         | 35               | 19                 | 45                 | 59                 | 59.3        | 32.2          | 76.3          |
| GS121—Indian Ocean off South Africa   | 177,501        | 70               | 42                 | 122                | 125                | 56.0        | 33.6          | 97.6          |
| GS122a—Indian Ocean off South Africa  | 164,110        | 66               | 58                 | 90                 | 116                | 56.9        | 50.0          | 77.6          |
| GS123—Indian Ocean off South Africa   | 173,644        | 87               | 75                 | 103                | 105                | 82.9        | 71.4          | 98.1          |
